# Supplementary material for: Genotype-by-environment interaction of fertility traits in Danish Holstein cattle using a single-step genomic reaction norm model
Source: PubMed Central journal article supplement (PMC6781120; doi:10.1038/s41437-019-0192-4), 2019-02-13
Supplement: 41437_2019_192_MOESM1_ESM.pdf [file 41437_2019_192_MOESM1_ESM.pdf]

**Table S1.** The weights generated for each class of residual variance of each trait.

| Trait <sup>a</sup> | Group | Residual variance | Weight |
|--------------------|-------|-------------------|--------|
| AIS                | 1     | 0.8713            | 1.6059 |
| AIS                | 2     | 1.1525            | 1.2140 |
| AIS                | 3     | 1.3736            | 1.0186 |
| AIS                | 4     | 1.5898            | 0.8801 |
| AIS                | 5     | 1.7686            | 0.7911 |
| ICF                | 1     | 522.9747          | 1.3945 |
| ICF                | 2     | 625.6533          | 1.1657 |
| ICF                | 3     | 751.0613          | 0.9710 |
| ICF                | 4     | 893.1548          | 0.8166 |
| ICF                | 5     | 881.8061          | 0.8271 |
| IFL                | 1     | 2383.8825         | 1.4226 |
| IFL                | 2     | 2863.7357         | 1.1842 |
| IFL                | 3     | 3384.3507         | 1.0021 |
| IFL                | 4     | 3932.9976         | 0.8623 |
| IFL                | 5     | 4547.3322         | 0.7458 |
| NRR                | 1     | 0.2352            | 0.9984 |
| NRR                | 2     | 0.2415            | 0.9724 |
| NRR                | 3     | 0.2384            | 0.9850 |
| NRR                | 4     | 0.2264            | 1.0373 |
| NRR                | 5     | 0.1998            | 1.1755 |

<sup>a</sup> AIS: number of inseminations per conception; ICF: interval from calving to first insemination; IFL: interval from first to last insemination; NRR: non-return rate at 56 days after first insemination.

**Table S2.** Likelihood ratio test between RM and RNM.

| Trait <sup>a</sup> | $A H^b$  | likelihood ratio statistic (D) <sup>c</sup> | <i>P</i> -value <sup>d</sup> |
|--------------------|----------|---------------------------------------------|------------------------------|
| AIS                | <b>A</b> | 106.7                                       | 3.66E-24                     |
|                    | <b>H</b> | 105.7                                       | 6.01E-24                     |
| ICF                | <b>A</b> | 114.4                                       | 7.79E-26                     |
|                    | <b>H</b> | 120.5                                       | 3.69E-27                     |
| IFL                | <b>A</b> | 90.2                                        | 1.39E-20                     |
|                    | <b>H</b> | 91.2                                        | 8.59E-21                     |
| NRR                | <b>A</b> | 7.65                                        | 1.37E-02                     |
|                    | <b>H</b> | 8.83                                        | 7.52E-03                     |

<sup>a</sup> AIS: number of inseminations per conception; ICF: interval from calving to first insemination; IFL: interval from first to last insemination; NRR: non-return rate at 56 days after first insemination.

<sup>b</sup> **A** and **H**: pedigree-based and pedigree-genomic combined matrices, respectively.

<sup>c</sup> The likelihood ratio statistic was calculated as  $D = -2 * \log(\text{likelihood})$  for the RM +  $2 * \log(\text{likelihood})$  for the RNM.

<sup>d</sup> The *P*-value for the LRT was calculated as  $0.5P[\chi^2_{1 \text{ d.f.}} \geq D] + 0.5P[\chi^2_{2 \text{ d.f.}} \geq D]$ .

**Table S3.** Chromosomes (Chr), initial positions (Start), final positions (End), percentages of intercept and slope variances (gVar) explained by the top 10 genomic windows for ICF and IFL, and candidate genes located in these regions.

| Trait | Intercept |           |           |       |                   | Slope |          |          |       |                   |
|-------|-----------|-----------|-----------|-------|-------------------|-------|----------|----------|-------|-------------------|
|       | Chr       | Start     | End       | gVar  | Genes             | Chr   | Start    | End      | gVar  | Genes             |
| ICF   | 23        | 24042335  | 24904300  | 4.34% | <i>IL17;IL17F</i> | 23    | 24042335 | 24904300 | 3.00% | <i>IL17;IL17F</i> |
|       | 17        | 70776835  | 71585018  | 1.13% | <i>LIF</i>        | 17    | 70776835 | 71585018 | 1.85% | <i>LIF</i>        |
|       | 9         | 14745626  | 15640590  | 0.94% |                   | 28    | 37682570 | 38961890 | 0.76% |                   |
|       | 4         | 86354358  | 87191167  | 0.82% |                   | 1     | 44752791 | 45614604 | 0.72% | <i>RAB5A;TFG</i>  |
|       | 6         | 91023863  | 91906227  | 0.79% | <i>EREG;AREG</i>  | 9     | 14745626 | 15640590 | 0.48% |                   |
|       | 16        | 68014396  | 68889225  | 0.68% | <i>TPR</i>        | 27    | 32281266 | 33149699 | 0.37% |                   |
|       | 4         | 111183448 | 112080616 | 0.47% |                   | 16    | 68014396 | 68889225 | 0.34% | <i>TPR</i>        |
|       | 6         | 67286349  | 68546212  | 0.44% |                   | 24    | 58983505 | 60208205 | 0.28% | <i>MC4R</i>       |
|       | 11        | 1045889   | 1666202   | 0.39% |                   | 4     | 86354358 | 87191167 | 0.25% |                   |
|       | 16        | 43522152  | 45197527  | 0.32% | <i>NMNATI</i>     | 6     | 91023863 | 91906227 | 0.23% | <i>EREG;AREG</i>  |

|     |    |           |           |       |                   |    |           |           |       |                    |
|-----|----|-----------|-----------|-------|-------------------|----|-----------|-----------|-------|--------------------|
| IFL | 8  | 12067528  | 14030646  | 1.26% |                   | 22 | 47103229  | 48063014  | 0.87% | <i>IL17RB;CHDH</i> |
|     | 6  | 92922752  | 93961099  | 0.47% |                   | 23 | 24042335  | 24904300  | 0.71% | <i>IL17;IL17F</i>  |
|     | 8  | 100308341 | 101231366 | 0.44% |                   | 17 | 70776835  | 71585018  | 0.63% | <i>LIF</i>         |
|     | 24 | 50306117  | 51840480  | 0.33% | <i>MBD1;SMAD4</i> | 15 | 64436323  | 65408389  | 0.62% | <i>CD59</i>        |
|     | 1  | 128962989 | 129774934 | 0.33% |                   | 15 | 59183752  | 60144021  | 0.53% | <i>BDNF</i>        |
|     | 5  | 87843519  | 88725393  | 0.29% |                   | 11 | 99096532  | 100108508 | 0.52% |                    |
|     | 5  | 84941287  | 86142655  | 0.29% | <i>BCAT1</i>      | 21 | 18338067  | 19379299  | 0.49% |                    |
|     | 22 | 4735174   | 5546862   | 0.23% | <i>TGFBR2</i>     | 14 | 47298921  | 48226460  | 0.46% | <i>TNFRSF11B</i>   |
|     | 15 | 64436323  | 65408389  | 0.23% | <i>CD59</i>       | 4  | 92742789  | 93739544  | 0.44% | <i>LEP</i>         |
|     | 27 | 14671414  | 15447004  | 0.22% |                   | 8  | 108556349 | 109347548 | 0.43% | <i>TLR4</i>        |

---

<sup>a</sup>ICF: interval from calving to first insemination; IFL: interval from first to last insemination.
